# Supplementary material for: The status of causality in biological databases: data resources and data retrieval possibilities to support logical modeling
Source: PubMed Central journal article supplement (PMC8294520; doi:10.1093/bib/bbaa390), 2020-12-30
Supplement: supplementaryfiles_bbaa390.pdf [file supplementaryfiles_bbaa390.pdf]

## Supplementary Files

### Supplementary File S1: Comparison of the data accession possibilities of the different integrated databases presented in this manuscript.

|                       | Cytoscape plugin               | Web service                     | Libraries                            | Export                                                     |
|-----------------------|--------------------------------|---------------------------------|--------------------------------------|------------------------------------------------------------|
| BioGateway [1,2]      | <a href="#">BioGateway App</a> | -                               | -                                    | SIF, all Cytoscape export formats                          |
| OmniPath [3,4]        | <a href="#">OmniPath App</a>   | REST API                        | Python ( <a href="#">pypath</a> ), R | SIF, BEL                                                   |
| NDEx [5]              | <a href="#">CyNDEx-2 App</a>   | REST API                        | Java, Python, R                      | SIF, Cytoscape CX                                          |
| Pathway Commons [6,7] | <a href="#">CyPath2 App</a>    | API                             | Java, Python, R                      | SIF, TXT, BioPAX L3, JSON-LD, GSEA                         |
| PathMe [8]            | -                              | <a href="#">Web application</a> | Python ( <a href="#">pathme</a> )    | BEL, GraphML, CSV, SIF, Node-link JSON, Cytoscape CX, GSEA |
| Bio2BEL [9]           | -                              | -                               | Python ( <a href="#">bio2bel</a> )   | BEL, GraphML, CSV, SIF, Node-link JSON, Cytoscape CX, GSEA |

### Supplementary File S2: Some useful links to resources presenting the structure of the different data formats presented in this manuscript.

PSI-MITAB2.8 (GitBook with column definitions):

<https://psicquic.github.io/MITAB28Format.html> (accessed 10.10.2020)

BEL (official documentation): <https://language.bel.bio> and

<https://biological-expression-language.github.io> (accessed 10.10.2020)

GO-CAM (webpage): <https://geneontology.cloud> (accessed 10.10.2020)

SBMLqual (Level 3 specification webpage):

[http://sbml.org/Documents/Specifications/SBML\\_Level\\_3/Packages/Qualitative\\_Models\\_\(qual\)](http://sbml.org/Documents/Specifications/SBML_Level_3/Packages/Qualitative_Models_(qual))

(accessed 10.10.2020)

## References

1. Antezana E, Blondé W, Egaña M, et al. BioGateway: a semantic systems biology tool for the life sciences. *BMC Bioinformatics* 2009; 10:S11
2. Holmås S, Riudavets Puig R, Acencio ML, et al. The Cytoscape BioGateway App: explorative network building from an RDF store. *Bioinformatics* 2020; 36:1966–1967
3. Türei D, Korcsmáros T, Saez-Rodriguez J. OmniPath: guidelines and gateway for literature-curated signaling pathway resources. *Nat. Methods* 2016; 13:966–967
4. Ceccarelli F, Turei D, Gabor A, et al. Bringing data from curated pathway resources to Cytoscape with OmniPath. *Bioinformatics* 2020; 36:2632–2633
5. Pratt D, Chen J, Welker D, et al. NDEx, the Network Data Exchange. *Cell Syst.* 2015; 1:302–305
6. Cerami EG, Gross BE, Demir E, et al. Pathway Commons, a web resource for biological pathway data. *Nucleic Acids Res.* 2011; 39:D685–D690
7. Rodchenkov I, Babur O, Luna A, et al. Pathway Commons 2019 Update: integration, analysis and exploration of pathway data. *Nucleic Acids Res.* 2020; 48:D489–D497
8. Domingo-Fernández D, Mubeen S, Marín-Llaó J, et al. PathMe: merging and exploring mechanistic pathway knowledge. *BMC Bioinformatics* 2019; 20:243
9. Hoyt CT, Domingo-Fernández D, Mubeen S, et al. Integration of Structured Biological Data Sources using Biological Expression Language. *bioRxiv* 2019; 631812
